# Supplementary material
Source: publisher figshare collection journal article supplement (https://karger.figshare.com/articles/dataset/_/5126473)

## Phosphate Binding Reduces Aortic Angiotensin Converting Enzyme and Enhances Nitric Oxide Bioactivity in Experimental Renal Insufficiency

Arttu Eräranta et al.

**Supplementary Figure S1.** Plots of aortic (A) and cardiac (B) angiotensin- converting enzyme (ACE) content determined using autoradiography in the 12-week pilot study, Ca=high-calcium diet, NX=5/6 nephrectomized rats; n=8-10 in each group, mean±SEM, \* $P<0.05$  for the high-calcium diet effect, two-way ANOVA.

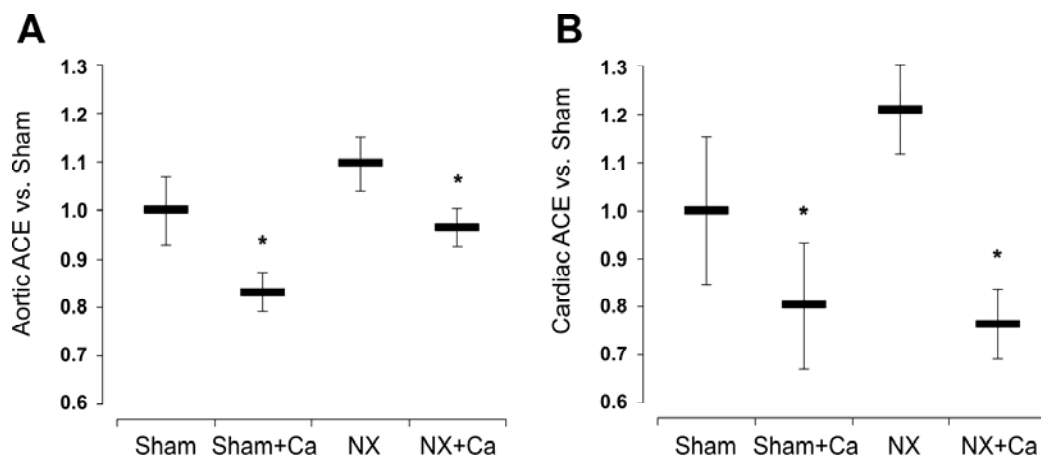

# Phosphate Binding Reduces Aortic Angiotensin Converting Enzyme and Enhances Nitric Oxide Bioactivity in Experimental Renal Insufficiency

Eräranta et al.

**Supplementary Figure S2.** Representative figure of aortic calcifications in the study groups.

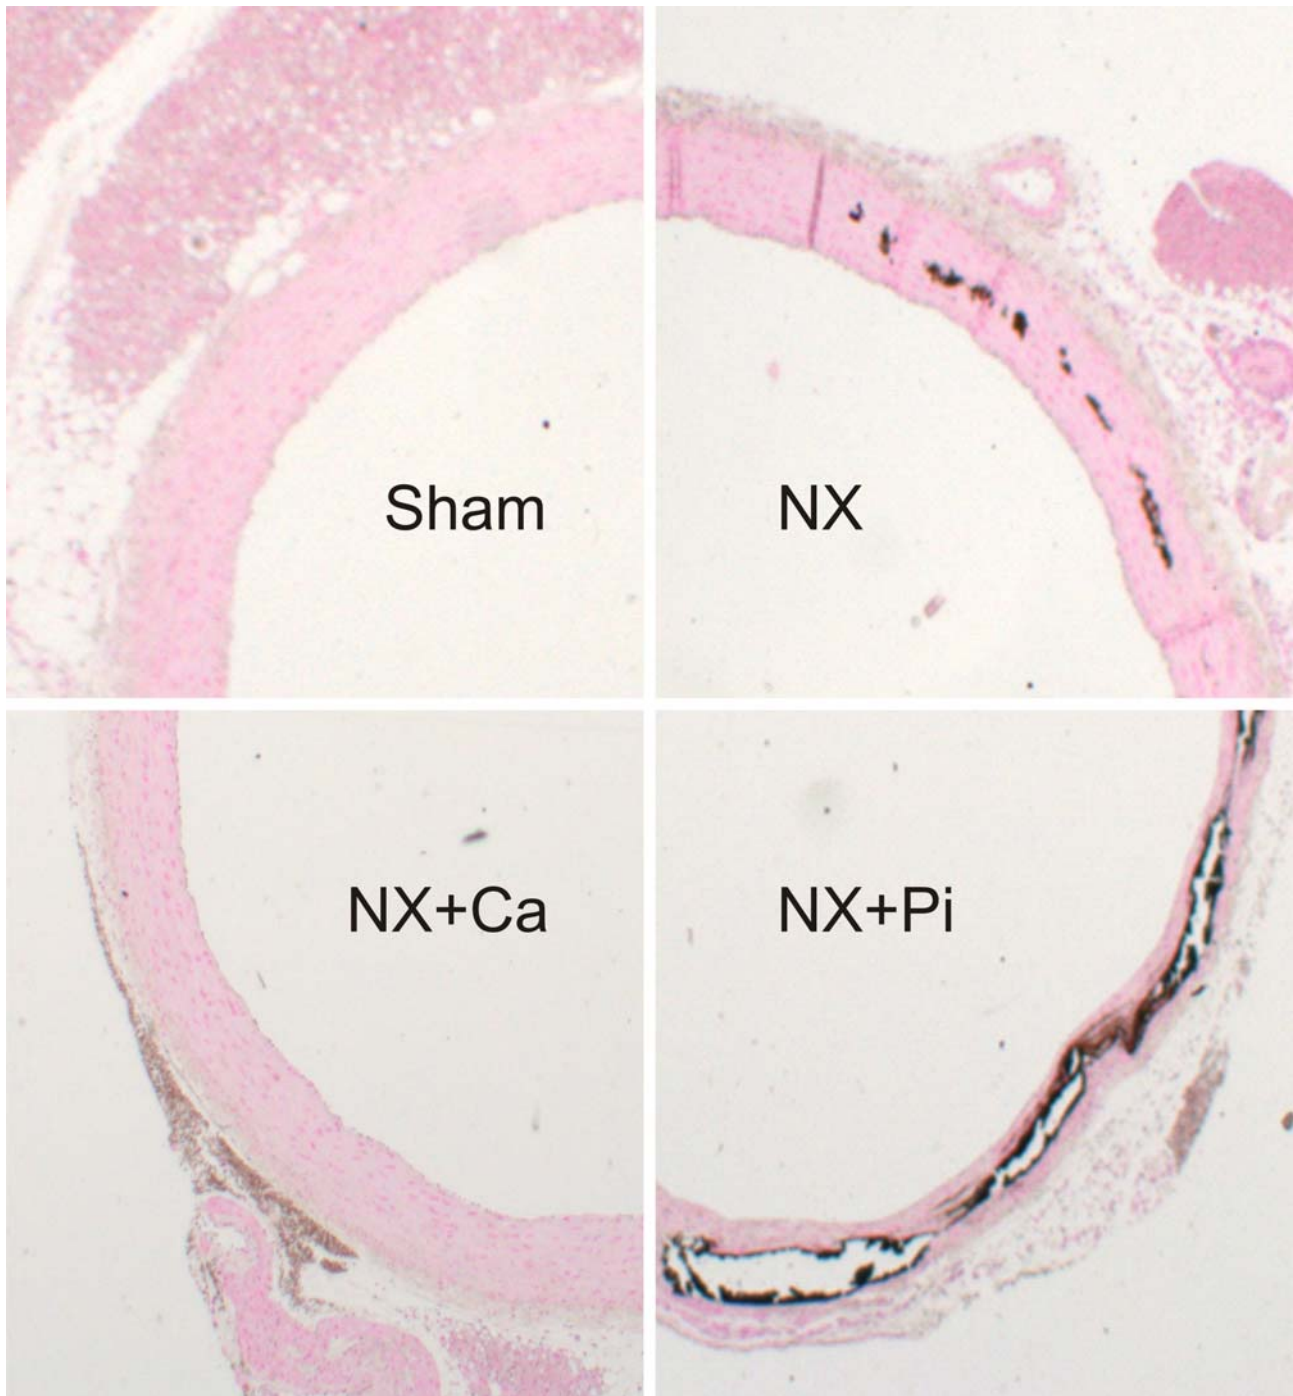

Supplement: Supplementary file 1 [file 1]
