# Supplementary material
Source: publisher figshare collection journal article supplement (https://karger.figshare.com/articles/dataset/_/5126473)
Supplement: Supplementary file 2 [file 1]

**Phosphate Binding Reduces Aortic Angiotensin Converting Enzyme  
and Enhances Nitric Oxide Bioactivity in Experimental Renal Insufficiency**

Arttu Eräranta et al.

**Supplementary Table S1.** Parameters of contractile responses of isolated mesenteric arterial rings in the experimental groups

|                              | Sham      | NX         | NX+Ca                  | NX+Pi                   |
|------------------------------|-----------|------------|------------------------|-------------------------|
| Norepinephrine (+E)          |           |            |                        |                         |
| pD <sub>2</sub> (-log mol/L) | 6.45±0.11 | 6.73±0.11  | 6.44±0.07              | 6.98±0.20* <sup>‡</sup> |
| Maximal wall tension (mN/mm) | 5.46±0.32 | 4.56±0.38  | 5.25±0.36              | 4.15±0.49*              |
| Potassium Chloride (-E)      |           |            |                        |                         |
| pD <sub>2</sub> (-log mol/L) | 1.54±0.01 | 1.55±0.02  | 1.55±0.02              | 1.58±0.02               |
| Maximal wall tension (mN/mm) | 4.89±0.37 | 4.79±0.42  | 5.42±0.48              | 3.70±0.59               |
| Angiotensin II (+E)          |           |            |                        |                         |
| pD <sub>2</sub> (-log mol/L) | 8.21±0.09 | 7.99±0.07  | 7.92±0.13*             | 8.12±0.10               |
| Maximal wall tension (mN/mm) | 0.50±0.12 | 0.97±0.18* | 0.46±0.12 <sup>†</sup> | 0.63±0.11               |

Values are mean±SEM; +E and -E, endothelium-intact and -denuded arterial rings respectively; pD<sub>2</sub>, negative logarithm of concentration of agonist producing 50% of maximal contractile force; \*P<0.05 versus Sham; <sup>†</sup>P<0.05 versus NX, <sup>‡</sup>P<0.05 versus NX+Ca.
